# Supplementary material for: Dynamics of Cyclooxygenase-1 Positive Microglia/Macrophage in the Retina of Pathological Model Mice as a Biomarker of the Retinal Inflammatory Diseases
Source: PubMed Central journal article supplement (PMC8036698; doi:10.3390/ijms22073396), 2021-03-25
Supplement: ijms-22-03396-s001.pdf [file ijms-22-03396-s001.pdf]

**Supplemental Information**

**Dynamics of cyclooxygenase-1 positive microglia/macrophage in the retina of pathological model mice as a biomarker of the retinal inflammatory diseases**

Kenichi Makabe, Sunao Sugita, Yoko Futatsugi, and Masayo Takahashi

**Inventory of Supplemental Information**

Figure S1, resting microglia in normal retina

Figure S2, microglia/macrophage activation in NMDA retinal neurotoxicity model

Figure S3, microglia/macrophage activation in LPS treated ocular inflammation model

Figure S4, microglia/macrophage activation in EAU model

**Supplemental Figure 1**

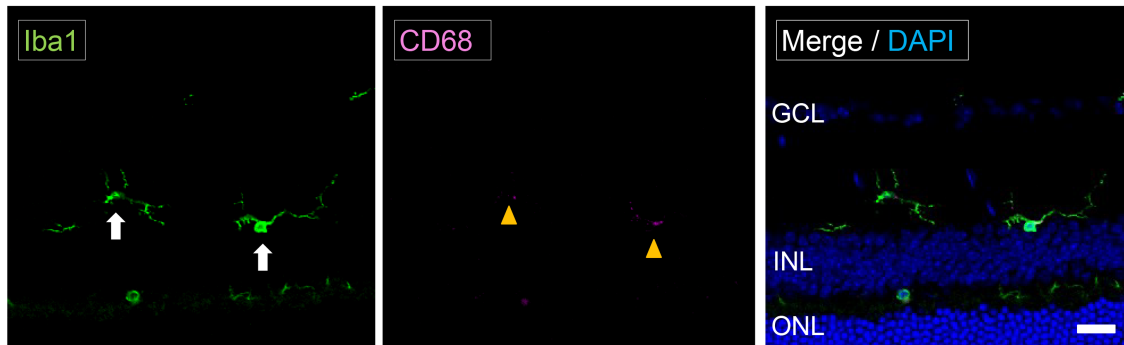

**Figure S1. Microglia at resting state in the retina of normal mouse.**

Photomicrographs of the retina in normal mouse labeled with Iba1 (microglia/macrophage marker; left) and CD68 (activated microglia/macrophage marker; middle). The Iba1<sup>+</sup> cells were ramified microglia with long processes (white arrows). Immunopositivity of CD68 were very weak (yellow arrowhead).

Scale bar, 20 $\mu$ m.

**Supplemental Figure 2**

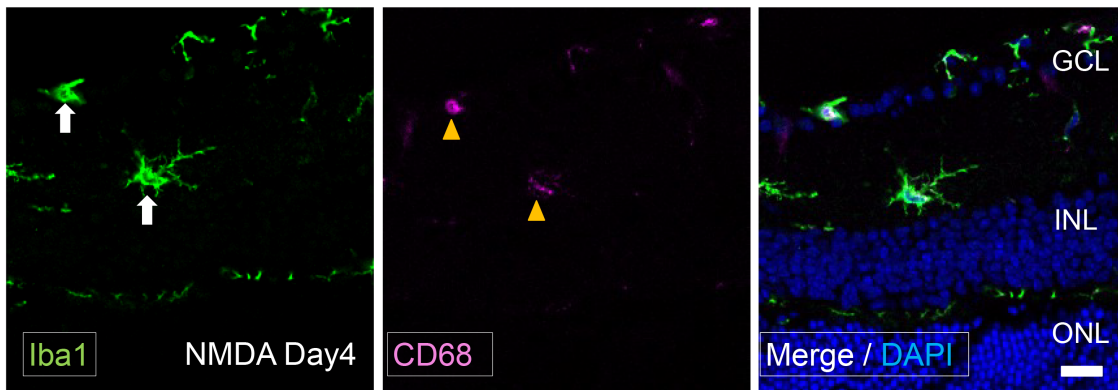

**Figure S2. Active microglia/macrophage in the retina of NMDA retinal neurotoxicity model.**

Photomicrographs of the retina in NMDA retinal neurotoxicity model mice 4 days after NMDA-administration (NMDA Day 4) labeled with Iba1 (left) and CD68 (middle). The processes of Iba1<sup>+</sup> cells were shorter and thicker than normal (white arrows), and the cells were CD68 positive (yellow arrowheads). Scale bar, 20 $\mu$ m.

**Supplemental Figure 3**

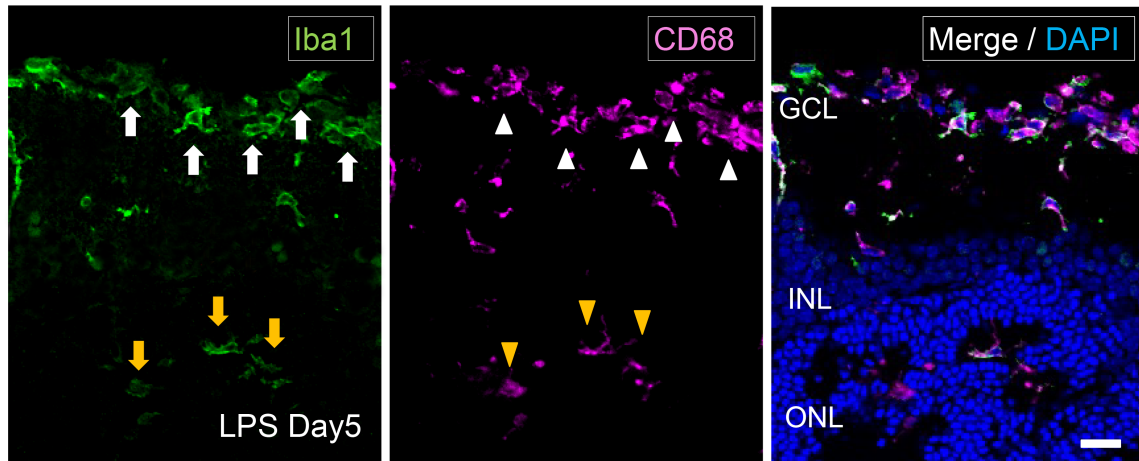

**Figure S3. Activation and migration of microglia/macrophage in the retina of LPS treated ocular inflammation model.**

Photomicrographs of the retina in LPS treated ocular inflammation model mice 5 days after LPS-administration (LPS Day 5) labeled with Iba1 (left) and CD68 (middle).

Iba1-positive amoeboid cells accumulated around the GCL (white arrows), and were CD68 positive (white arrowheads). There were Iba1-positive amoeboid cells that infiltrated into the ONL (yellow arrows), which were also CD68 positive (yellow arrowheads). Scale bar, 20 $\mu$ m.

Supplemental Figure 4

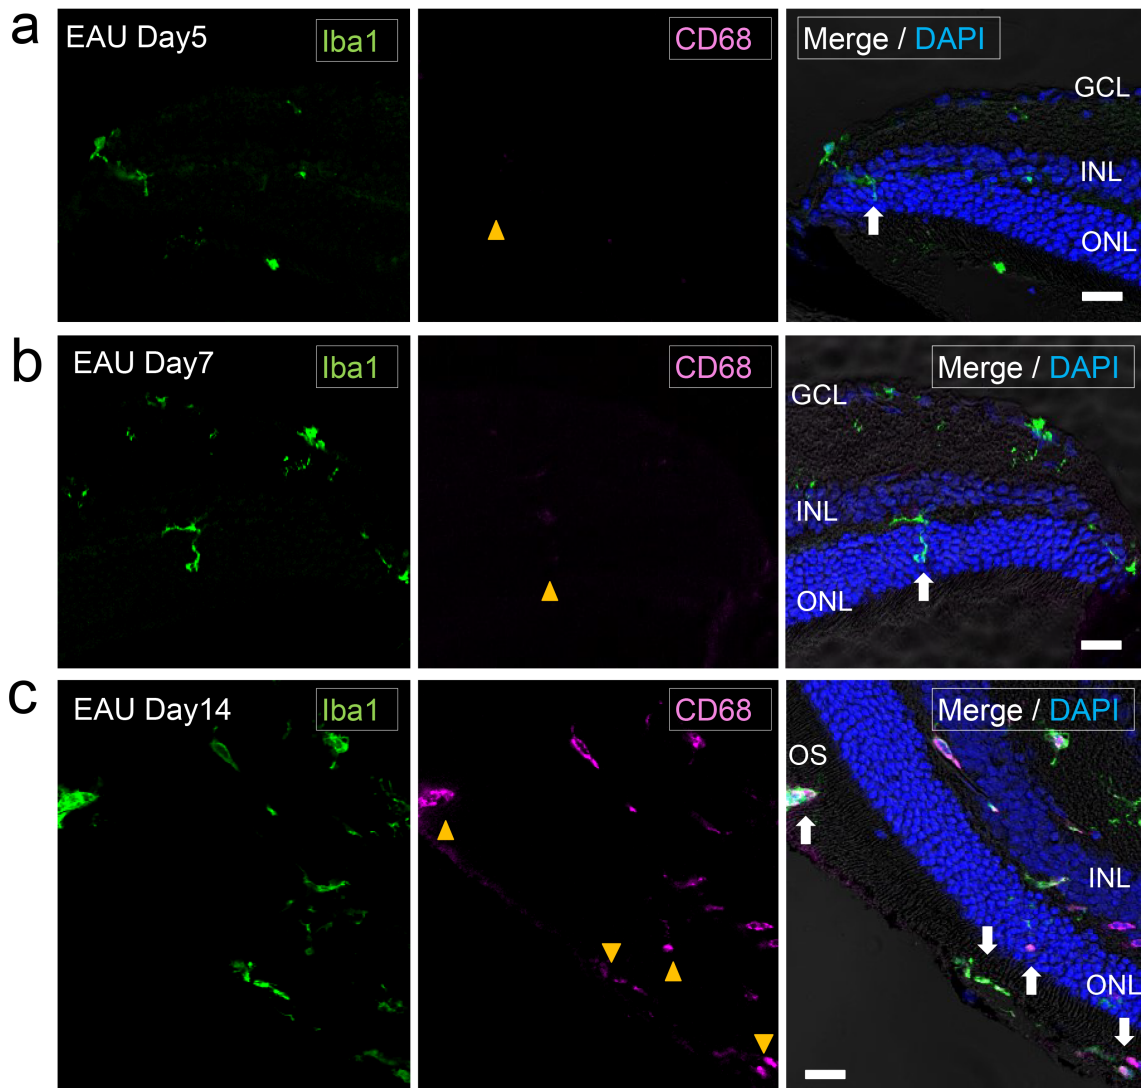

**Figure S4 Activation and migration of microglia/macrophage in retina of EAU model**

Photomicrographs of the retina in EAU model mice labeled with Iba1 (left) and CD68 (middle).

(a) Five days after immunization (Day 5), Iba1<sup>+</sup> lamified cells with processes had infiltrated into the ONL (white arrow). These cells were CD68 negative (yellow arrowhead). Scale bar, 20 $\mu$ m.

(b) On Day 7, Iba1<sup>+</sup> lamified cells with processes had infiltrated into the ONL (white arrow). CD68 was negative in them (yellow arrowhead). Scale bar, 20µm.

(c) On Day 14, Iba1<sup>+</sup> amoeboid cells infiltrating into the ONL and the OS were observed (white arrows). These cells were CD68 positive (yellow arrowheads). Scale bar, 20µm.
